# Supplementary material
Source: PubMed Central journal article supplement (PMC2929576)
Supplement: NIHMS219379-supplement-01.pdf [file NIHMS219379-supplement-01.pdf]

## SUPPLEMENTAL DATA

**Table A. Variables used in Propensity Score Matching**

---

Patient-related variables:

Age at transplant: continuous

Karnofsky performance status at transplant:  $\geq 90\%$  vs  $< 90\%$ 

Sex: male vs female

Disease-related:

Disease stage at diagnosis: I or II vs. III or IV

Chemosensitive disease at transplant: Sensitive vs resistant

B symptoms at diagnosis: present vs absent

Time from diagnosis to transplant: continuous

Extranodal disease or splenic involvement at diagnosis: yes vs no

Marrow involvement at diagnosis: yes vs no

Treatment-related:

Source of stem cells: bone marrow vs peripheral blood

Year of transplant: continuous

---

**Table B. Patient characteristics among matched pairs.**

| Variable                                                  | Autologous |                    | Allogeneic |                     | P-value |
|-----------------------------------------------------------|------------|--------------------|------------|---------------------|---------|
|                                                           | N          | N (%)              | N          | N (%)               |         |
| Number of patients                                        |            | 232                |            | 69                  |         |
| Age, median (range), years                                | 232        | 48 (20 - 60)       | 69         | 46 (21 - 59)        | 0.25    |
| Male sex                                                  | 232        | 144 (62)           | 69         | 42 (61)             | 0.86    |
| Karnofsky score pre-transplant, <90                       | 232        | 97 (42)            | 69         | 28 (41)             | 0.83    |
| Disease stage at diagnosis                                | 232        |                    | 69         |                     | 0.88    |
| I                                                         |            | 20 ( 9)            |            | 8 (12)              |         |
| II                                                        |            | 31 (13)            |            | 8 (12)              |         |
| III                                                       |            | 49 (21)            |            | 14 (20)             |         |
| IV                                                        |            | 132 (57)           |            | 39 (57)             |         |
| B Symptoms at diagnosis                                   | 232        | 121 (52)           | 69         | 37 (54)             | 0.98    |
| Marrow involvement at diagnosis                           | 232        | 79 (34)            | 69         | 22 (32)             | 0.94    |
| Extranodal disease or splenic involvement at diagnosis    | 232        | 154 (66)           | 69         | 44 (64)             | 0.92    |
| Number of prior chemotherapy regimens                     | 232        |                    | 69         |                     | 0.93    |
| 1                                                         |            | 30 (13)            |            | 6 ( 9)              |         |
| 2                                                         |            | 98 (42)            |            | 30 (43)             |         |
| 3                                                         |            | 70 (30)            |            | 21 (30)             |         |
| 4                                                         |            | 28 (12)            |            | 10 (14)             |         |
| 5                                                         |            | 6 ( 3)             |            | 2 ( 3)              |         |
| Chemosensitive disease at transplant                      | 232        | 161 (69)           | 69         | 42 (61)             | 0.18    |
| Time from diagnosis to transplant, median (range), months | 232        | 11.0 (2.0 - 190.7) | 69         | 10.4 (2.0 - 156.2)  | 0.27    |
| Graft source                                              | 232        |                    | 69         |                     | 0.17    |
| BM                                                        |            | 52 (22)            |            | 21 (30)             |         |
| PB                                                        |            | 180 (78)           |            | 48 (70)             |         |
| Year of transplant                                        | 232        |                    | 69         |                     | 0.71    |
| 1995-1997                                                 |            | 103 (44)           |            | 29 (42)             |         |
| 1998-2000                                                 |            | 70 (30)            |            | 19 (27)             |         |
| 2001-2003                                                 |            | 59 (25)            |            | 21 (30)             |         |
| Median follow-up of survivors, months                     | 107        | 56.5 (0.5 - 128.6) | 17         | 66.9 (14.0 - 120.4) | 0.29    |

**Table C. Multivariate analysis for treatment-related mortality after autologous and HLA-identical sibling Allogeneic HCTs for diffuse large B-cell lymphoma**

| Variables:                                 | N   | Relative Risk<br>(95% CI) | P-value                         |
|--------------------------------------------|-----|---------------------------|---------------------------------|
| <b>Transplant type<sup>a</sup>:</b>        |     |                           | $P^b_{\text{overall}} = <0.001$ |
| Within first 12 months after transplant    |     |                           |                                 |
| Autologous                                 | 834 | 1.00                      |                                 |
| Allogeneic                                 | 79  | 4.88 (3.21 - 7.40)        | <0.001                          |
| Beyond first 12 months after transplant    |     |                           |                                 |
| Autologous                                 | 441 | 1.00                      |                                 |
| Allogeneic                                 | 23  | 1.09 (0.34 - 3.49)        | 0.89                            |
| <u>Other significant covariates:</u>       |     |                           |                                 |
| Age at transplant                          |     |                           |                                 |
| 18-30 years                                | 120 | 1.00 <sup>c</sup>         | $P^b_{\text{overall}} = 0.001$  |
| 31-50 years                                | 468 | 0.97 (0.60 - 1.56)        | 0.89                            |
| 51-60 years                                | 325 | 1.73 (1.07 - 2.80)        | 0.025                           |
| Karnofsky performance status at transplant |     |                           |                                 |
| ≥90%                                       | 560 | 1.00 <sup>c</sup>         | $P^b_{\text{overall}} = 0.001$  |
| <90%                                       | 331 | 1.66 (1.24 - 2.24)        | 0.001                           |
| Unknown                                    | 22  | 2.35 (1.08 - 5.13)        | 0.032                           |
| Chemosensitive disease at transplant       |     |                           |                                 |
| Sensitive                                  | 752 | 1.00                      |                                 |
| Resistant                                  | 161 | 1.76 (1.22 - 2.53)        | 0.003                           |
| Year of transplant                         |     |                           |                                 |
| 2001-2003                                  | 174 | 1.00                      |                                 |
| 1995-2000                                  | 739 | 1.67 (1.08 - 2.60)        | 0.022                           |

Abbreviations: CI = confidence interval.

\* Comparison was restricted to chemo sensitive and resistant patients only.

<sup>a</sup> Time dependant covariates. The effect of transplant type differs with the length of time after transplant.

<sup>b</sup> Two degrees of freedom

<sup>c</sup> Reference group

**Table D. Multivariate analysis comparing relapse/progression**

| Variables:                              | N   | Relative Risk<br>(95% CI) | P-value                        |
|-----------------------------------------|-----|---------------------------|--------------------------------|
| <b>Transplant type<sup>a</sup>:</b>     |     |                           | $P^b_{\text{overall}} = 0.77$  |
| Within first 12 months after transplant |     |                           |                                |
| Autologous                              | 834 | 1.00                      |                                |
| Allogeneic                              | 79  | 1.12 (0.73 - 1.72)        | 0.59                           |
| Beyond first 12 months after transplant |     |                           |                                |
| Autologous                              | 441 | 1.00                      |                                |
| Allogeneic                              | 23  | 0.70 (0.17 - 2.89)        | 0.62                           |
| <u>Other significant covariates:</u>    |     |                           |                                |
| Age at transplant                       |     |                           |                                |
| 18-30 years                             | 120 | 1.00 <sup>c</sup>         | $P^b_{\text{overall}} = 0.001$ |
| 31-50 years                             | 468 | 1.57 (1.07 - 2.29)        | 0.02                           |
| 51-60 years                             | 325 | 2.06 (1.40 - 3.04)        | <0.001                         |
| Chemosensitive disease at transplant    |     |                           |                                |
| Sensitive                               | 752 | 1.00                      |                                |
| Resistant                               | 161 | 2.74 (2.13 - 3.52)        | <0.001                         |

Abbreviations: CI = confidence interval.

\* Comparison was restricted to chemo sensitive and resistant patients only.

<sup>a</sup> Time dependant covariates. The effect of transplant type differs with the length of time after transplant.

<sup>b</sup> Two degrees of freedom

<sup>c</sup> Reference group

**Table E. Multivariate analysis for treatment failure (progression-free survival)**

| Variables:                              | N   | Relative Risk<br>(95% CI) | P-value                         |
|-----------------------------------------|-----|---------------------------|---------------------------------|
| <b>Transplant type<sup>a</sup>:</b>     |     |                           | $P_{\text{overall}}^b = <0.001$ |
| Within first 12 months after transplant |     |                           |                                 |
| Autologous                              | 834 | 1.00                      |                                 |
| Allogeneic                              | 79  | 2.06 (1.54 - 2.75)        | <0.001                          |
| Beyond first 12 months after transplant |     |                           |                                 |
| Autologous                              | 441 | 1.00                      |                                 |
| Allogeneic                              | 23  | 0.86 (0.35 - 2.12)        | 0.74                            |
| <u>Other significant covariates:</u>    |     |                           |                                 |
| Age at transplant                       |     |                           |                                 |
| 18-30 years                             | 120 | 1.00 <sup>c</sup>         | $P_{\text{overall}}^b = <0.001$ |
| 31-50 years                             | 468 | 1.32 (0.98 - 1.77)        | 0.07                            |
| 51-60 years                             | 325 | 1.95 (1.44 - 2.63)        | <0.001                          |
| Chemosensitive disease at transplant    |     |                           |                                 |
| Sensitive                               | 752 | 1.00                      |                                 |
| Resistant                               | 161 | 2.39 (1.94 - 2.94)        | <0.001                          |
| Year of transplant                      |     |                           |                                 |
| 2001-2003                               | 174 | 1.00                      |                                 |
| 1995-2000                               | 739 | 1.45 (1.13 - 1.86)        | 0.004                           |

Abbreviations: CI = confidence interval.

\* Comparison was restricted to chemo sensitive and resistant patients only.

<sup>a</sup> Time dependant covariates. The effect of transplant type differs with the length of time after transplant.

<sup>b</sup> Two degrees of freedom

<sup>c</sup> Reference group

**Table F. Multivariate analysis for survival (mortality)**

| Variables:                                 | N   | Relative Risk<br>(95% CI) | P-value                         |
|--------------------------------------------|-----|---------------------------|---------------------------------|
| <b>Transplant type<sup>a</sup>:</b>        |     |                           | $P^b_{\text{overall}} = <0.001$ |
| Within first 12 months after transplant    |     |                           |                                 |
| Autologous                                 | 837 | 1.00                      |                                 |
| Allogeneic                                 | 79  | 2.75 (2.03 - 3.72)        | <0.001                          |
| Beyond first 12 months after transplant    |     |                           |                                 |
| Autologous                                 | 523 | 1.00                      |                                 |
| Allogeneic                                 | 26  | 0.93 (0.43 - 1.99)        | 0.84                            |
| <u>Other significant covariates:</u>       |     |                           |                                 |
| Age at transplant                          |     |                           |                                 |
| 18-30 years                                | 120 | 1.00 <sup>c</sup>         | $P^b_{\text{overall}} = <0.001$ |
| 31-50 years                                | 470 | 1.10 (0.81 - 1.49)        | 0.56                            |
| 51-60 years                                | 326 | 1.72 (1.26 - 2.35)        | 0.001                           |
| Karnofsky performance status at transplant |     |                           |                                 |
| ≥90%                                       | 562 | 1.00 <sup>c</sup>         | $P^b_{\text{overall}} = 0.006$  |
| <90%                                       | 332 | 1.35 (1.12 - 1.63)        | 0.001                           |
| Unknown                                    | 22  | 1.22 (0.67 - 2.25)        | 0.51                            |
| Chemosensitive disease at transplant       |     |                           |                                 |
| Sensitive                                  | 755 | 1.00                      |                                 |
| Resistant                                  | 161 | 2.31 (1.86 - 2.86)        | <0.001                          |
| Year of transplant                         |     |                           |                                 |
| 2001-2003                                  | 174 | 1.00                      |                                 |
| 1995-2000                                  | 742 | 1.55 (1.18 - 2.03)        | 0.002                           |

Abbreviations: CI = confidence interval.

\* Comparison was restricted to chemo sensitive and resistant patients only.

<sup>a</sup> Time dependant covariates. The effect of transplant type differs with the length of time after transplant.

<sup>b</sup> Two degrees of freedom

<sup>c</sup> Reference group
